# Supplementary material for: Overexpression of Latent TGFβ Binding Protein 4 in Muscle Ameliorates Muscular Dystrophy through Myostatin and TGFβ
Source: PLOS journal article supplement (doi:10.1371/journal.pgen.1006019), 2016-05-05

S3 Fig. Fiber area is unchanged in WT vs LTBP4 TG+ quadriceps muscle. TG+ quadriceps has an increase in the largest fibers, those >6500  $\mu\text{m}^2$ .

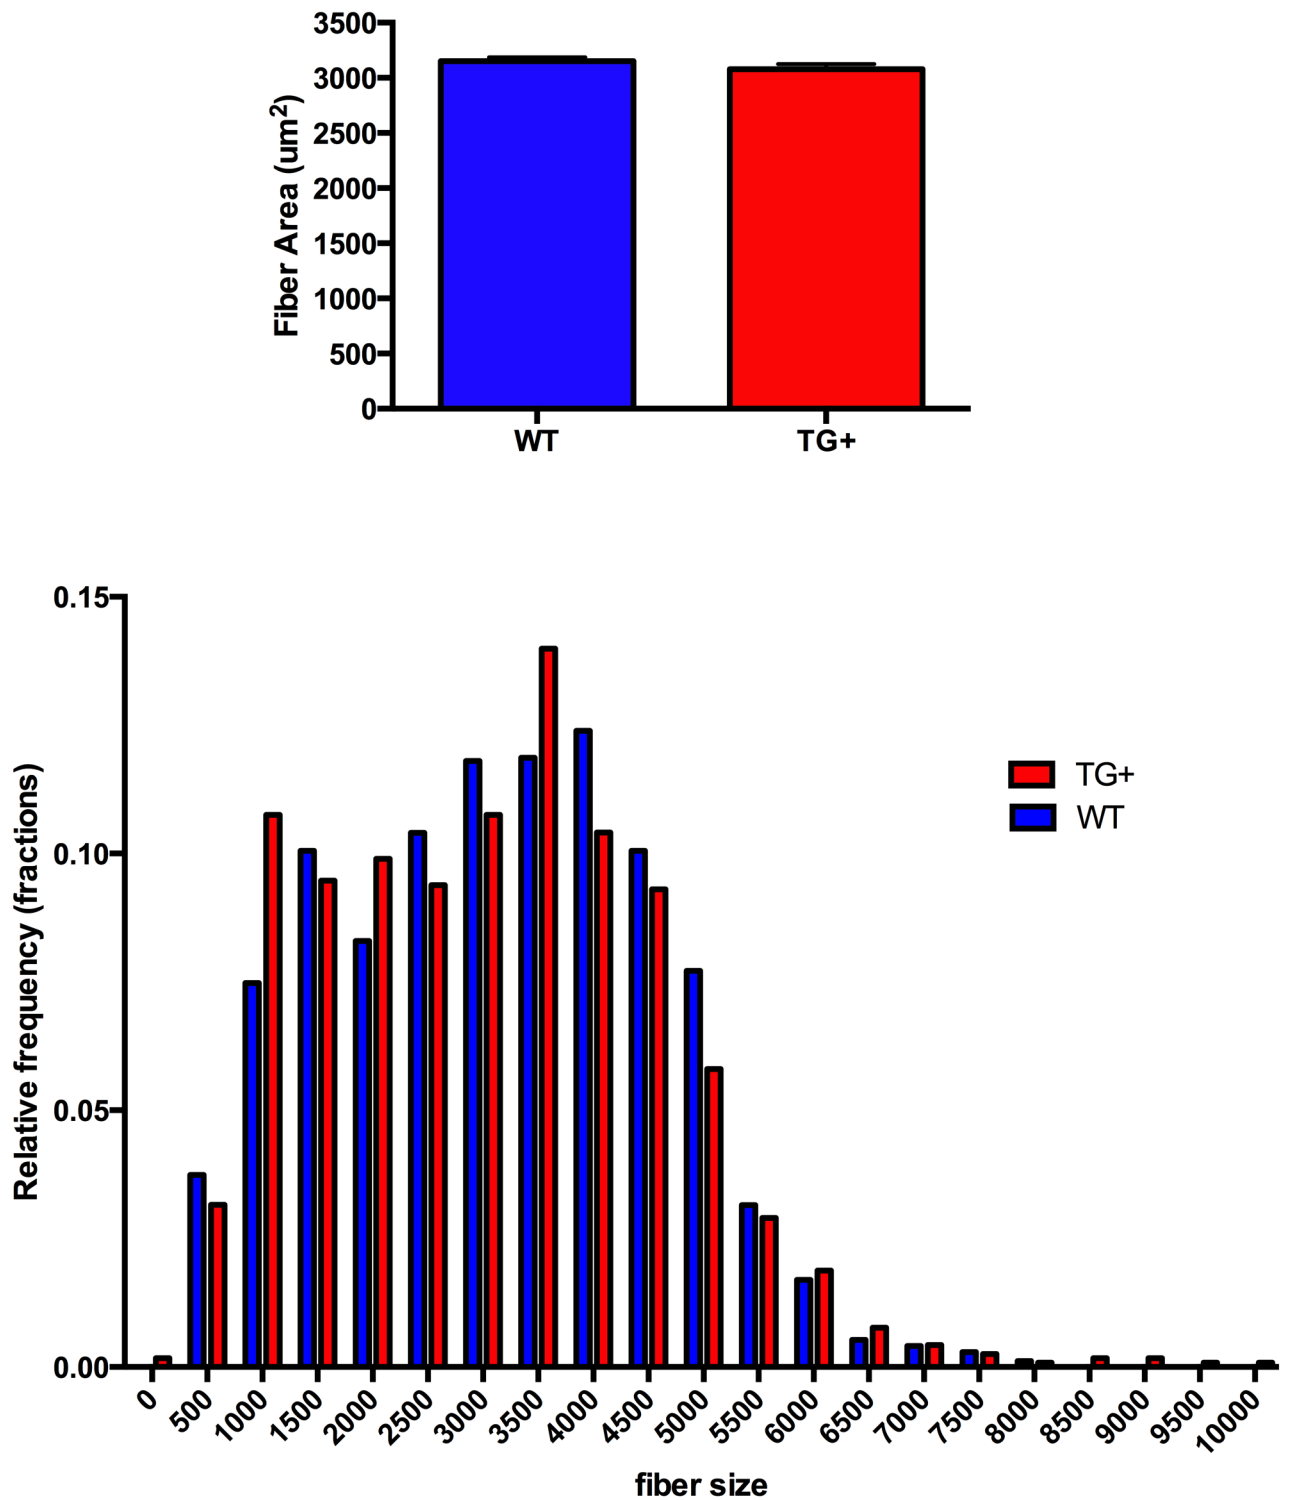

Supplement: S3 (10.1371/journal.pgen.1006019.s003) [file journal.pgen.1006019.s003]
